1 **TITLE:**

2 **Bacterial diversity along a 2 600 km river continuum**

3

4 **Contributors:**

5 Savio Domenico<sup>1,2</sup>, Sinclair Lucas<sup>3</sup>, Ijaz Umer Z.<sup>4</sup>, Blaschke Alfred P.<sup>1,5</sup>, Reischer Georg

6 H.<sup>2,7</sup>, Blöschl Guenter<sup>1,5</sup>, Mach Robert L.<sup>2</sup>, Kirschner Alexander K.T.<sup>6,7</sup>, Farnleitner Andreas

7 H.<sup>1,2,7</sup>, Eiler Alexander<sup>3\*</sup>

8

9 \* Correspondence: A Eiler, Department of Ecology and Genetics, Limnology, Uppsala

10 University, Norbyv. 18D, Uppsala, SE-75236, Sweden

11 email: [alexander.eiler@ebc.uu.se](mailto:alexander.eiler@ebc.uu.se)

12

13 1 Centre for Water Resource Systems (CWRS), Vienna University of Technology, Vienna,

14 Austria

15 2 Research Group Environmental Microbiology and Molecular Ecology, Institute of Chemical

16 Engineering, Vienna University of Technology, Vienna, Austria

17 3 Department of Ecology and Genetics, Limnology, and Science for Life Laboratory, Uppsala

18 University, Uppsala, Sweden

19 4 School of Engineering, University of Glasgow, Glasgow, UK

20 5 Institute of Hydraulic Engineering and Water Resource Management, Vienna University of

21 Technology, Vienna, Austria

22 6 Institute for Hygiene and Applied Immunology, Water Hygiene, Medical University Vienna,

23 Vienna, Austria

24 7 Interuniversity Cooperation Centre Water and Health, [www.waterandhealth.at](http://www.waterandhealth.at)

25

26 **for submission to ISME J**



## 28 Abstract

29 Understanding the biogeochemistry of large rivers is of high relevance as they play a major  
30 role in the global carbon cycle and provide diverse ecosystem services. Since these ecosystem  
31 functions are mainly mediated by bacteria, knowledge about their diversity represents a  
32 centrepiece in determining the role of rivers in the landscape. Here, we present a  
33 comprehensive dataset on the bacterioplankton diversity along a 2 600 km midstream transect  
34 of the second largest river in Europe, the Danube River, and its tributaries using an Illumina<sup>®</sup>-  
35 based sequencing approach (16S rRNA-gene amplicon sequencing). Our analysis revealed  
36 that bacterial richness and evenness gradually declined downwards the river in both the 0.2-  
37 3.0  $\mu\text{m}$  and the  $> 3.0 \mu\text{m}$  size fractions. These shifts of the bacterioplankton community  
38 along the river was also underpinned by beta diversity analysis where effects of tributaries  
39 were negligible in regards to the overall variation. In addition, we found very few taxa typical  
40 for lotic systems and that the relative contribution of so-called typical freshwater bacteria  
41 often observed in lakes was increasing towards the river mouth. This supports the hypothesis  
42 of a succession from soil and groundwater bacteria towards lake bacteria in lotic systems.  
43 Putting our findings into a broad ecological context, we suggest that patterns of  
44 bacterioplankton diversity in large rivers follow predictions of the River Continuum Concept  
45 published in 1980, with a modification for planktonic microorganisms.

46

## 47 Keywords

48 bacterial diversity/gradual development/next-generation sequencing/river continuum  
49 concept/riverine bacterioplankton

## 50 Introduction

51 Streams and rivers are important compartments of landscapes. Besides linking lakes and  
 52 terrestrial with marine systems, lotic systems provide essential ecosystem services as they  
 53 supply drinking water, water for irrigation and industry, hydropower, transport routes and  
 54 areas for recreation. Of general importance is their role in biogeochemical nutrient cycling.  
 55 Until recently, rivers and streams were mainly considered as pipes shuttling organic material  
 56 and nutrients from the land to the oceans. This view has changed as lotic together with lentic  
 57 systems are now considered as “leaky funnels” in the cycling of elements as they play an  
 58 important role in the temporary storage (sequestration) and in the transformation of terrestrial  
 59 organic matter (Ensign & Doyle, 2006; Cole *et al.*, 2007; Withers & Jarvie, 2008; Battin *et*  
 60 *al.*, 2009). As a result of recognizing the role of rivers and streams in the carbon cycle (see for  
 61 example the report by IPCC in 2013; <http://www.ipcc.ch/>), lotic networks and the diverse  
 62 processes in their water column and sediments have received increasing interest (Kronvang *et*  
 63 *al.*, 1999; Beaulieu *et al.*, 2010; Seitzinger *et al.*, 2010; Aufdenkampe *et al.*, 2011; Benstead &  
 64 Leigh, 2012; Raymond *et al.*, 2013). Looking into the “black box” of nutrient processing in  
 65 freshwater systems, bacteria are regarded as the main transformers of elemental nutrients and  
 66 as substantial contributors to energy flow and nutrient cycling on a global scale (Cotner &  
 67 Biddanda, 2002; Battin *et al.*, 2009; Findlay, 2010; Madsen, 2011). For open lotic systems  
 68 such as rivers, however, there is still a big lack of knowledge about the diversity of bacterial  
 69 communities and how this diversity is linked with ecosystem functioning (Battin *et al.*,  
 70 2009). This includes that there is still no agreement on how distinct river bacterioplankton is  
 71 from that of other freshwater systems, how variable diversity is along whole river transects  
 72 and what is regulating this diversity.

73 Summarizing previous studies, it can be concluded that bacteria affiliated to the phyla of  
 74 *Proteobacteria* (especially *Betaproteobacteria*), *Bacteroidetes*, *Cyanobacteria* and  
 75 *Verrucomicrobia* are dominating the bacterial communities in rivers (Crump *et al.*, 1999;

76 Zwart *et al.*, 2002; Cottrell *et al.*, 2005; Winter *et al.*, 2007; Lemke *et al.*, 2008; Mueller-Spitz  
77 *et al.*, 2009; Newton *et al.*, 2011; Liu *et al.*, 2012). These explorative studies on freshwater  
78 bacterial communities suggest that riverine bacterioplankton form a cohesive group with the  
79 abundant taxa in lakes and is therefore comprised of so-called “typical” freshwater bacteria  
80 (Zwart *et al.*, 2002; Lozupone & Knight, 2007; Newton *et al.*, 2011). Nevertheless, all these  
81 studies were constrained by their low sequencing depth and focus on the dominant members  
82 of the communities. A reasonable sequencing depth, however, is a prerequisite for estimating  
83 the communities' diversity and identifying fine-scale changes as a response to changing  
84 environmental conditions. To do so, a minimum sequencing depth of 1 000 and 5 000 16S  
85 rRNA gene reads per sample was suggested for a proper analysis of beta and alpha diversity,  
86 respectively (Lundin *et al.*, 2012). These methodological constraints have been overcome  
87 with the recent rise of Next-Generation Sequencing (NGS) (Shokralla *et al.*, 2012). The ultra-  
88 deep sequencing of bacterial communities by targeting short hyper-variable regions of the 16S  
89 rRNA gene not only allows a proper investigation of diversity, in particular richness, but also  
90 the detection and investigation of rare populations with critical functions for distinct  
91 ecosystems (Sogin *et al.*, 2006; Gilbert *et al.*, 2012; Sjöstedt *et al.*, 2012). In large rivers,  
92 NGS-studies on the microbial community composition are very rare with only a few available  
93 studies on the bacterioplankton communities of the Amazonas River (Brazil), Mississippi  
94 River (USA) and Columbia River Estuary (USA), mainly revealing taxonomic patterns  
95 (Fortunato *et al.*, 2013; Staley *et al.*, 2013). In these studies, the longitudinal development of  
96 the bacterioplankton communities along the rivers could not be addressed comprehensively  
97 since only a few sites were analysed. Considering the changing environmental gradients along  
98 rivers (Sekiguchi *et al.*, 2002; Winter *et al.*, 2007; Velimirov *et al.*, 2011), it can be expected  
99 that the bacterial communities will be variable as well as their function. This variability in  
100 community composition and function has been hypothesized to originate from the import of  
101 illuviated terrestrial bacteria and distinct freshwater communities from merging tributaries,

anthropogenic pollution from point sources like wastewater treatment plants or from diffuse natural or anthropogenic sources from soil erosion or agriculture (Zampella *et al.*, 2007; Tu, 2011; Besemer *et al.*, 2012). Other sources for observed variability can be impoundments or river regulation that alter hydrology, retention time or nutrient concentrations, consequently changing the structure and function of the autochthonous bacterial community (Bukaveckas *et al.*, 2002; Ruiz-González *et al.*, 2013). For macroorganisms, the large scale patterns seen in diversity from headwater streams to large rivers has been summarized in the River Continuum Concept (RCC) where diversity is expected to increase until midstream reaches, then to drop towards the river mouth. The RCC states that this pattern is due to the gradient of physical factors formed by the drainage network, as well as dynamics in chemical properties and resulting biological activity (Vannote *et al.*, 1980).

Here, we extend the RCC to river bacterioplankton by showing results from a NGS study on the bacterial community composition and how variability in bacterioplankton diversity is related to environmental conditions along a continuous river transect of 2 600 km from medium-sized reaches to the mouth of a large river. As study object the Danube River was chosen which is the second largest river of Europe by discharge and length. The Danube drains a basin of approximately 801,000 km<sup>2</sup> and borders 19 countries with 83 million inhabitants (Sommerwerk *et al.*, 2010).

## **Material and methods**

### **Study sites and sample collection**

Samples were taken within the frame of the second Joint Danube Survey (JDS 2) in the year 2007. The overall purpose of the Joint Danube Surveys is the comprehensive evaluation of the chemical and ecological status of the whole Danube River on the basis of the European Union Water Framework Directive (WFD) (Liska *et al.*, 2008). During sampling from Aug 15 to Sept 26 2007, 75 sites were sampled along the mainstream of the Danube River as well as 21

of the Danube's major tributaries and branches along its shippable way from river kilometre (rkm) 2 600 to rkm 0 (=river mouth) (Kirschner *et al.*, 2009). The 43 days represent the average retention time for a water mass in this part of the Danube river (for discussion about this see (Velimirov *et al.*, 2011).

For more detailed information on the sampling sites see (Kirschner *et al.*, 2009) and (Velimirov *et al.*, 2011). Samples were taken with sterile 1 L glass flasks from a water depth of approximately 30 cm. For DNA-extraction from attached bacterioplankton, depending on the biomass-concentration, 120-300 mL river water was filtered through 3.0 µm pore-sized polycarbonate filters (Cyclopore, Whatman, Germany) by vacuum filtration. The filtrate, representing the bacterioplankton fraction smaller than 3.0 µm (later referred to as “free-living” bacterioplankton) was collected in a sterile glass bottle and subsequently filtered through 0.2 µm pore-sized polycarbonate filters (Cyclopore, Whatman, Germany). The filters were stored at -80 °C until DNA extraction.

## Supporting data

Within the frame of the Joint Danube Survey 2, a wide range of chemical and biological parameters was collected (Liska *et al.*, 2008). All data, sampling methods as well as analytical methods are made publicly available via the official website of the International Commission for the Protection of the Danube River (ICPDR; <http://www.icpdr.org/wq-db/>). Selected data from JDS 1 & 2 were published previously in several studies (Kirschner *et al.*, 2009; Janauer *et al.*, 2010; Velimirov *et al.*, 2011; von der Ohe *et al.*, 2011).

## DNA extraction and quantification of bacterial DNA using quantitative PCR (qPCR)

Genomic DNA was extracted using a slightly modified protocol of a previously published phenol-chloroform bead-beating procedure (Griffiths *et al.*, 2000) using isopropanol instead of polyethylene glycol for DNA precipitation. Total DNA concentration was assessed

applying the Quant-iT™ PicoGreen® dsDNA Assay Kit (Life Technologies Corporation, USA) and 16S rRNA genes were quantified using domain-specific quantitative PCR. Quantitative PCR reactions contained 2.5 µL of 1:4 and 1:16 diluted DNA extract as template, 0.2 µM of primers targeting the V1-V2 region of most bacterial 16S rRNA genes (8F, 5'-AGAGTTTGATCCTGGCTCAG-3' and 338R, 5'-TGCTGCCTCCCGTAGGAGT-3') (MWG Biotech AG, Ebersberg, Germany) and iQ™ SYBR® Green Supermix (Bio-Rad Laboratories, Hercules, USA) (Frank *et al.*, 2007; Fierer *et al.*, 2008). Ratios of measured 16S rRNA gene copy numbers in the different sample dilutions deviating markedly from 1 after multiplication with the respective dilution factor were interpreted as indication for PCR-inhibition.

#### **Preparation of 16S rRNA gene amplicon libraries**

For the preparation of amplicon libraries, 16S rRNA genes were amplified and barcoded in a two-step procedure in order to reduce PCR-bias introduced by long primers with barcode- and sequencing adaptor-overhangs (Berry *et al.*, 2011). We followed the protocol as described by Sinclair *et al.* (submitted). In short, 16S rRNA gene fragments of most bacteria were amplified applying primers targeting the V3-V4 variable regions (341F, 5'-CCTACGGGNGGCWGCAG-3' and 805R, 5'-GACTACHVGGGTATCTAATCC-3' (Herlemann *et al.*, 2011). In 25 µL reactions containing 0.5 µM primer 341F and 805R (MWG), 200 µM dNTPs (Invitrogen), 0.5 U Q5 HF DNA polymerase and provided buffer (New England Biolabs, USA), genomic DNA was amplified in duplicates in 20 cycles. In order to use equal amounts of bacterial template DNA for increased comparability and reduction of PCR-bias, the final volume of environmental DNA extract used for each sample was calculated based on 16S rRNA gene copy concentration in the respective sample determined earlier by quantitative PCR (see above). For 105 samples, the self-defined optimum volume of environmental DNA-extract corresponding to  $6.4 \times 10^5$  16S rRNA genes was spiked into the first step PCR reactions whereas for 27 samples, lower concentrations



were used due to limited amounts of bacterial genomic DNA or PCR-inhibition detected by quantitative PCR (see above). These 132 samples included eight biological replicates. Prior, we removed four samples because of their extremely low genomic DNA-concentrations and 16S rRNA gene copy numbers. Duplicates of PCR-products were pooled, diluted 1:100 and used as templates in the subsequent barcoding-PCR. In this PCR, diluted 16S rRNA gene amplicons were amplified using 50 primer pairs with unique barcode pairs (Sinclair *et al.*, submitted). The barcoding PCRs for most samples were conducted in triplicates analogously to first step PCR (n=100). Remaining 32 samples with weak bands in first step PCR due to low genomic template DNA-concentrations or high sample-dilution to avoid detected PCR-inhibition were amplified in 6-9 replicates in order to increase amplicon DNA yield. Barcoded PCR amplicons were pooled equimolarly after purification using the Agencourt AMPure XP purification system (Beckman Coulter, Danvers, MA, USA) and quantification of amplicon-concentration using the Quant-iT™ PicoGreen® dsDNA Assay Kit (Life Technologies Corporation, USA). Finally, in total, 137 samples including 5 negative controls resulted in four pools for sequencing.

## **Illumina® sequencing**

Sequencing was performed on a Illumina® MiSeq at SciLife Lab Uppsala. For each pool, library preparation was performed separately following the TruSeq protocol with the exception of initial fragmentation and size selection. This involves the binding of the standard sequencing adapters in combination with separate Illumina®-specific MID barcodes that enables the combination of different pools on the same sequencing run (Sinclair *et al.*, submitted). After pooling, random PhiX DNA was added to provide calibration and help with the cluster generation on the MiSeq's flow cell.

## **16S rRNA gene amplicon data analysis**

206 Sequence data was processed as outlined in Sinclair *et al.* (submitted). In short, paired-end  
 207 16S rRNA amplicon read assembly was conducted using PANDAseq (Masella *et al.*, 2012).  
 208 After pooling of all reads originating from the four pools, reads were filtered based on Phred  
 209 scores. Truncation of barcode sequences and insertion of barcodes into read-label was  
 210 performed as recommended by Edgar (2013). Chimera removal and OTU (Operational  
 211 taxonomic units) clustering at three percent sequence dissimilarity was performed based on all  
 212 assembled reads occurring at least twice and performed applying UPARSE-denovo-picking  
 213 (Edgar, 2013). Taxonomic annotation of OTUs was performed by matching to the quality  
 214 checked SILVAmod-database (Lanzén *et al.*, 2012) using CREST. Plastid, mitochondrial and  
 215 archaeal sequences were removed. Additionally, OTUs were also taxonomically annotated as  
 216 “typical” freshwater bacteria using a freshwater database (Newton *et al.*, 2011). If necessary,  
 217 OTU-resampling for standardization of sequence numbers per sample was performed using  
 218 the 'rrarefy'-function implemented in the R-package vegan (Oksanen *et al.*, 2013).  
 219 Biodiversity measure calculation, statistical analyses as well as plot-generation were  
 220 conducted in R (R Core Team, 2013) and using python scripts.

221 Habitat index for the top 5 000 OTUs was determined using the SEQenv pipeline  
 222 (<http://environments.hcmr.gr/seqenv.html>). SEQenv pipeline retrieves hits to highly similar  
 223 sequences from public repositories (NCBI Genbank) and uses a text mining module to  
 224 identify Environmental Ontology (EnvO) (Ref: <http://environmentontology.org/>) terms  
 225 mentioned in the text records carrying environmental contextual information (“Isolation  
 226 Source” field entry for genomes in Genbank or associated PubMed abstracts). At the time of  
 227 running SEQenv on our dataset, in version 0.8, there were around 1200 EnvO terms organized  
 228 into three main branches namely, *environmental material*, *environmental feature*, and *biome*  
 229 and give a concise and controlled description of the environments. However, we have used  
 230 SEQenv to retrieve a subset of these terms, i.e., those that contain “Habitat”  
 231 (ENVO:00002036).

232 Sequences have been deposited...

233

## 234 **Results**

### 235 **General description of sequences**

236 In total, 132 DNA samples extracted from filtered water from the Danube River and its  
237 tributaries plus 5 negative controls were sequenced. Sequencing yielded 2 030 029 sequence  
238 read pairs ranging from 3 451 to 24 873 per sample. After all quality filtering and mate-pair  
239 assembly as outlined in Sinclair *et al.* (submitted), 1 572 361 assembled sequence reads (from  
240 here on only referred to as “reads”) were obtained from the 132 high-quality samples. OTU-  
241 clustering resulted in 8 697 OTUs after removal of 625 Plastid-, Mitochondrion-,  
242 Thaumarchaeota-, Crenarchaeota- and Euryarchaeota-assigned OTUs which represented 19.1  
243 percent of the reads. Further, rarefaction to 2 347 reads per sample (= minimum number of  
244 reads in any one sample) and additional removal of OTUs with < 2 reads reduced the number  
245 of OTUs to 5 082 for beta diversity analysis. For alpha diversity analysis, all samples with  
246 less than 7 000 reads were excluded resulting in 8 241 OTUs in the remaining 88 samples  
247 after resampling.

248

### 249 **Core microbial community**

250 The majority of all bacteria-assigned OTUs (4 402 of 8 697) was only represented by less  
251 than ten reads in all samples. As a consequence, 3 243 of 8 697 OTUs (~ 37 percent) were  
252 represented in only one to four samples and additional 2 219 OTUs (~ 26 percent) in just as  
253 few as five to nine samples. Besides these rare OTUs, the core community in the Danube  
254 River was comprised of 89 OTUs for the free-living bacterioplankton community as defined  
255 by all OTUs that are represented in at least 90 percent of all samples of the respective size  
256 fraction. The corresponding number of OTUs for the particle-attached core community was  
257 141. The cumulative contribution of OTUs based on their occurrence along the entire river

transect is shown in Figure 1A for both analysed size fractions (0.2-3.0  $\mu\text{m}$  and  $> 3.0 \mu\text{m}$ , representing the free-living and particle-attached bacterial communities). Based on this figure the core communities of the free-living and particle-attached bacteria were defined by their presence in at least 90 percent of the samples of the respective size fraction. On average, 81 percent of all reads of the free-living river community and 63 percent of all reads of the attached river community belonged to the respective core community. For both core communities a significant increase of their relative quantitative contribution towards the river mouth could be observed (see Figure 1B).

### **Variability of diversity along the river**

Chao1 richness estimator as well as Pielou's evenness (J) were separately calculated for both size fractions of the main river after resampling of samples with originally more than 7 000 reads (n=88). The estimated richness was persistently higher in the attached fraction with an average of 2 025 OTUs compared to the free-living fraction with 1 248 OTUs on average. We observed a gradual decrease of the bacterial richness in both size fractions along the Danube River (Figure 2A) which was confirmed by regression analysis (Table 1). A similar significant decrease was observed for J along the course of the river (Figure 2B).

The visualization of beta diversity by applying non-metric multidimensional scaling (NMDS) mirrored the gradual development (Figure 3) and a significant relationship was observed between community composition from both size fractions and river kilometre (Table 2). Additional environmental variables corresponding with compositional dynamics when excluding tributaries are given in Table 2. As shown in the NMDS, tributaries did not follow the general patterns and often formed outliers in the multidimensional space. Moreover, the clear separation of the bacterial communities into two distinct groups based on the filter fractions could be confirmed by PERMANOVA ( $R^2=0.156$ ,  $p\text{-value}<0.01$ ). The apparent synchrony in the gradual development in the two size fractions along the river's course could

also be shown by Procrustes test ( $R = 0.96$ ,  $p < 0.001$ ). Still, the permutation test on the betadispersion of each size fraction revealed a significantly higher variability in the  $>3 \mu\text{m}$  fraction than the  $0.2\text{-}3.0 \mu\text{m}$  fraction along the river transect ( $p\text{-value}=0.002$ ) (see Fig. S2).

### Typical River bacterioplankton

Results from the screening procedure for so-called typical freshwater-bacteria according to Newton and colleagues (2011) revealed a high proportion of particular OTUs assigned to previously described freshwater taxa (Figure 4). These included the LD12-tribe belonging to the subphylum of *Alphaproteobacteria* as well as the acI-B1-, acI-A7- and acI-C2-tribes belonging to the order of *Actinomycetales* of the phylum *Actinobacteria*. Interestingly, in the free-living size fraction a clear trend was observed where the relative abundance of the four above-mentioned tribes increased clearly towards the river mouth (Figure 4A) contributing at most 35 percent to the total free-living community. In correspondence, there is a clear decrease of atypical freshwater reads (labelled “Everything else”) for the free-living fraction while tribe-level-assignable reads steadily increased along the river as shown in Figure 4B. In the attached fraction, these typical freshwater taxa are much less abundant (see Figure 4B). Here, reads that could not be assigned to previously described typical freshwater taxa clearly dominate the community with the exception of the samples closest to the river mouth, in which an increase of the above mentioned typical freshwater bacteria could also be observed. Annotation of sequences based on environmental descriptive terms occurring within their Genbank (NCBI) records corroborate the specific findings of our study that bacteria of the different size fractions seem to have distinct preferred habitats as indicated by statistical analysis using the habitat annotations (PERMANOVA  $R^2=0.42$ ;  $p<0.0001$ ). Restricting the analysis to 'groundwater' and 'soil' terms indicated that the proportion of bacteria potentially originating from these sources decreased towards the river mouth (Figure 5A and B). Opposite to what we expected, we could not depict a trend along the Danube River transect

using the contribution of 'river' and 'sediment' terms. Furthermore, we found only four OTUs annotated as 'typical river bacterioplankton' as defined by river terms dominating their environmental onthology.

## Discussion

A rapidly increasing number of studies applying novel high-throughput sequencing technologies have revealed a tremendous diversity within microbial communities residing in all kinds of aquatic environments (e.g., Sogin *et al.*, 2006; Andersson *et al.*, 2009; Galand *et al.*, 2009; Eiler *et al.*, 2012; Peura *et al.*, 2012). However, river bacterioplankton has so far been widely neglected with few exceptions (Ghai *et al.*, 2011; Fortunato *et al.*, 2013; Staley *et al.*, 2013). Here, we describe biogeographic patterns in lotic bacterioplankton communities over a 2 600 km longitudinal transect from mid-sized stream reaches (rkm 2 600) to the mouth (rkm 0) (corresponding to stream order 4 to 12 according to the RCC; Vannote *et al.*, 1980) by investigating their taxonomic composition and their specificity to the “river biome”. A previous publication from this survey has already shown that the bacterial compartment follows continuous trends along the Danube River by investigating bacterial abundance, morphotype composition and bacterial production (Velimirov *et al.*, 2011). In that study, it was shown that bacterial numbers, cell volumes, morphotype composition and attached bacterial production exhibited significant correlation with river kilometre and with several other environmental variables (Velimirov *et al.*, 2011) corresponding to our findings in conjunction with bacterial community composition (Table 2). Moreover, we recorded a significant decrease in bacterial richness in both examined size fractions, which lets us propose that the development of the bacterioplankton community in large rivers is in accordance with the 1980 published RCC (Vannote *et al.*, 1980). This highly debated concept, originally developed for aquatic macroorganisms, states that biological diversity should be highest in medium-sized stream reaches (stream order of 4 to

6), corresponding to the most upstream sites of our transect (rkm 2 600), and should decline from thereon towards the river mouth. Such a pattern of decreasing richness was previously observed for the bacterioplankton community development along the midstream reaches of the Upper Mississippi River where 10 sites along approximately 400 km were sampled (Staley *et al.*, 2013).

The fact that bacterioplankton is primarily passively transported in contrast to fish or aquatic invertebrates calls for modifications of the RCC. Vannote and colleagues emphasized the consideration of riparian influence, substrate or flow as potentially important factors affecting the biological diversity leading to the assumption that the riparian zone constantly provides allochthonous microbes to the river bacterioplankton species pool. This assumption is corroborated by our results of the SEQenv analysis where a decreasing contribution of groundwater (Fig. 5A) and soil (Fig. 5B) bacteria was observed from the mid-sized stream region towards the Danube River delta. Concomitant with decreasing influence from riparian zone and increasing stream order, the proportion of autochthonous river bacteria increased as indicated by the pronounced rise in the contribution of so-called typical freshwater bacteria especially in the free-living size fractions (see Figure 4). This suggests that at intermediate stream orders where both allochthonous and autochthonous bacteria can proliferate, diversity should be highest.

An additional explanation for the observed gradual decline in richness in the free-living fraction and especially in the attached fraction could be the decreasing diversity in the organic matter composition along our transect, with highest expected diversity in terms of quality and availability in the mid-sized stream reaches (first sites in our study). There, both allochthonous and autochthonous organic matter should be equally important providing a broad range of substrates for bacteria, with dominance of allochthonous organic compounds towards headwaters and autochthonous organic compounds towards the river's mouth. This compositional change regarding the source of organic matter along our transect can be

362 accompanied by a qualitative change along the continuum from more labile to more refractory  
363 organic compounds. Such a qualitative deterioration in turn should favour specialized and  
364 highly competitive bacteria capable of using low quality and homogenous organic matter  
365 sources in the downstream parts of the river. This assumption is also in accordance with the  
366 observed trend to smaller cells by Velimirov and colleagues (2011), e.g. based on a significant  
367 and constant increase of small coccoid cells towards the river mouth. Furthermore, this  
368 coincides with the observed increasing relative contribution of typical freshwater taxa such as  
369 LD12 and acI, which represent small cells with an oligotrophic lifestyle (Salcher *et al.*, 2011;  
370 Garcia *et al.*, 2013). The trend of a “selection” for smaller cells might additionally result from  
371 starvation of copiotrophic cells originating from terrestrial sources which are adapted to high  
372 quality and nutrient-rich compounds (Barcina *et al.*, 1997; Egli, 2010). However, proof for the  
373 role of organic matter sources in the apparent decline of richness towards the river mouth  
374 needs to be provided by assessing organic matter composition and bioavailability in future  
375 studies. Besides these bottom-up mechanisms, loss factors like sedimentation and top-down  
376 control (grazing and viral lysis) influence microbial diversity and have been shown to vary  
377 over environmental gradients (Ayo *et al.*, 2001; Weinbauer, 2004; Pernthaler, 2005) and can  
378 be selective against specific community members (Bouvier & Del Giorgio, 2007;  
379 Langenheder & Jürgens, 2001).

380 Moreover, our results show a concomitant decrease in evenness with bacterial richness in both  
381 size fractions along the river transect which points to a rise in competitiveness of few species  
382 attributable to an increase in stability and uniformity of the system along the river continuum.  
383 An alternative explanation for the decreasing evenness along the Danube could be a  
384 continuously progressive eutrophication of the system due to increasing availability of  
385 nutrients from allochthonous inputs such as from agricultural areas or sewage sources  
386 (Withers & Jarvie, 2008). However, the latter seems unlikely as a change in diversity  
387 estimates in the main river communities did not significantly correlate with chlorophyll a and



phosphorous as proxies for eutrophication (inferred by Spearman rank correlation). This finding is reinforced by the observation that despite a remarkable increase in total phosphorous and chlorophyll a concentrations as well as bacterial production (Velimirov *et al.*, 2011) along the stretch between Budapest (rkm 1 632) to Belgrade (rkm 1 168), we could not observe a marked decrease in richness and evenness. Similarly, there was also an increase in microbial faecal pollution along the stretch from Vienna (rkm 1 925) to Belgrade (rkm 1 168), indicative for wastewater effluents or the influence from highly polluted tributaries (Kirschner *et al.*, 2009), which was not reflected in richness and evenness. However, when including chloroplast-assigned sequence reads in the analysis, a decrease in evenness was observed in these stream reaches. Plastid-associated reads and high concentrations of chlorophyll a (4.34 – 30.64, mean = 15.12 ng/μL ) revealed a diatom bloom (*Thalassiosiraceae* as indicted by chloroplast 16S rRNA gene) in this stretch (rkm 1 632 to 1 132).

Illuminating our observations from a theoretical point of view and focussing more on the process of community assembly over time, the RCC states that „the concept of biological succession is of little use for river continua, because the communities in each reach have a continuous heritage rather than an isolated temporal composition within a sequence of discrete successional stages“; and „the concept implies that in natural river systems total absence of a population is rare, and biological subsystems are simply shifting spatially and not in the temporal sense typical for plant succession” (Vannote *et al.*, 1980). Latter hypothesis applied to bacterioplankton is partially supported by findings from bacterioplankton dynamics along the Upper Mississippi River (Staley *et al.*, 2013) and implied by a previous low resolution study on the Danube River (Winter *et al.*, 2007). The former identified a bacterial assemblage that appears spatially stable over ~ 400 km changing only minimally along the Upper Mississippi River. Similarly to these findings, our results show less first-time occurrences of new, not yet observed OTUs along the river transect with increasing distance

from upstream regions, pointing towards a core community along the Danube River. In our study, the proposed ubiquitous “core bacterial community“ was composed of approximately a hundred OTUs but contributed more than fifty percent to the total amplicon pool. Such OTUs belonging to the core community can be argued to represent superior competitors, especially when considering that they accumulated with increasing stream order. A likely consequence of their accumulation could be the decrease in alpha diversity along the river transect.

Focussing on the taxonomic composition along the river, our data shows that ”typical“ freshwater bacteria including members of the acI lineage, freshwater SAR11 (LD12) and the Polynucleobacter genus formed to a major part the „core bacterial community“. This finding that riverine bacterial communities can resemble those of lakes, clearly corroborates the existence of typical freshwater bacteria (Zwart *et al.*, 2002; Lozupone & Knight, 2007; Newton *et al.*, 2011). However, a modification of the 'typical freshwater bacteria concept' for rivers could be the consideration of the “succession” from soil and groundwater bacteria to “lake bacteria“ in the flowing wave with increasing stream order.

Summing up these findings, we propose that riverine bacterioplankton in a large river shifts towards a composition very similar to that of lakes with increasing stability of the system and reduced influence from the riparian zone. The resulting accumulation of typical freshwater bacteria is accompanied by a decrease in alpha diversity which is in accordance with the RCC.

#### **Acknowledgement**

This study was supported by the Austrian Science Fund (FWF) as part of the DKplus “Vienna Doctoral Programme on Water Resource Systems” (W1219-N22) and the FWF project P25817-B22 as well as the research project “Groundwater Resource Systems Vienna” in cooperation with Vienna Water (MA31). AE and LS are funded by the Swedish Foundation for Strategic Research (ICA10-0015). Infrastructure (cruise ships and floating laboratory) and

logistics for taking, storing and transporting samples were provided by the International Commission for the Protection of the Danube River (ICPDR). The computations were performed on resources provided by SNIC through Uppsala Multidisciplinary Center for Advanced Computational Science (UPPMAX) under project “b2011035”.

## Conflict of Interest Statement

The authors declare no conflict of interest

## References

- Andersson AF, Riemann L, Bertilsson S. (2009). Pyrosequencing reveals contrasting seasonal dynamics of taxa within Baltic Sea bacterioplankton communities. *ISME J* **4**:171–181.
- Aufdenkampe AK, Mayorga E, Raymond PA, Melack JM, Doney SC, Alin SR, *et al.* (2011). Riverine coupling of biogeochemical cycles between land, oceans, and atmosphere. *Front Ecol Environ* **9**:53–60.
- Ayo B, Santamaría E, Latatu A, Artolozaga I, Azúa I, Iriberry J. (2001). Grazing rates of diverse morphotypes of bacterivorous ciliates feeding on four allochthonous bacteria. *Lett Appl Microbiol* **33**:455–460.
- Barcina I, Lebaron P, Vives-Rego J. (1997). Survival of allochthonous bacteria in aquatic systems: a biological approach. *FEMS Microbiol Ecol* **23**:1–9.
- Battin TJ, Luysaert S, Kaplan LA, Aufdenkampe AK, Richter A, Tranvik LJ. (2009). The boundless carbon cycle. *Nature Geosci* **2**:598–600.
- Beaulieu JJ, Tank JL, Hamilton SK, Wollheim WM, Hall RO, Mulholland PJ, *et al.* (2010). Nitrous oxide emission from denitrification in stream and river networks. *Proc Natl Acad Sci U S A* **108**:214–219.
- Benstead JP, Leigh DS. (2012). An expanded role for river networks. *Nature Geosci* **5**:678–679.
- Berry D, Ben Mahfoudh K, Wagner M, Loy A. (2011). Barcoded primers used in multiplex amplicon pyrosequencing bias amplification. *Appl Environ Microbiol* **77**:7846–7849.
- Besemer K, Peter H, Logue JB, Langenheder S, Lindström ES, Tranvik LJ, *et al.* (2012). Unraveling assembly of stream biofilm communities. *The ISME journal* **6**:1459–1468.
- Bouvier T, Del Giorgio PA. (2007). Key role of selective viral-induced mortality in determining marine bacterial community composition. *Environ Microbiol* **9**:287–297.
- Bukaveckas P, Williams J, Hendricks S. (2002). Factors regulating autotrophy and heterotrophy in the main channel and an embayment of a large river impoundment. *Aquat Ecol* **36**:355–369.

- Cole JJ, Prairie YT, Caraco NF, McDowell WH, Tranvik LJ, Striegl RG, *et al.* (2007). Plumbing the global carbon cycle: Integrating inland waters into the terrestrial carbon budget. *Ecosystems* **10**:172–185.
- Cotner JB, Biddanda BA. (2002). Small players, large role: Microbial influence on biogeochemical processes in pelagic aquatic ecosystems. *Ecosystems* **5**:105–121.
- Cottrell MT, Waidner LA, Yu L, Kirchman DL. (2005). Bacterial diversity of metagenomic and PCR libraries from the Delaware River: Metagenomic analysis of freshwater bacteria. *Environ Microbiol* **7**:1883–1895.
- Crump BC, Armbrust EV, Baross JA. (1999). Phylogenetic analysis of particle-attached and free-living bacterial communities in the Columbia River, its estuary, and the adjacent coastal ocean. *Appl Environ Microbiol* **65**:3192–3204.
- Edgar RC. (2013). UPARSE: highly accurate OTU sequences from microbial amplicon reads. *Nat Methods* **10**:996–998.
- Egli T. (2010). How to live at very low substrate concentration. *Water Res* **44**:4826–4837.
- Eiler A, Heinrich F, Bertilsson S. (2012). Coherent dynamics and association networks among lake bacterioplankton taxa. *ISME J* **6**:330–342.
- Ensign SH, Doyle MW. (2006). Nutrient spiraling in streams and river networks. *J Geophys Res* **111**. <http://doi.wiley.com/10.1029/2005JG000114> (Accessed December 3, 2013).
- Fierer N, Hamady M, Lauber CL, Knight R. (2008). The influence of sex, handedness, and washing on the diversity of hand surface bacteria. *Proc Natl Acad Sci U S A* **105**:17994–17999.
- Findlay S. (2010). Stream microbial ecology. *J North Am Benthol Soc* **29**:170–181.
- Fortunato CS, Eiler A, Herfort L, Needoba JA, Peterson TD, Crump BC. (2013). Determining indicator taxa across spatial and seasonal gradients in the Columbia River coastal margin. *ISME J* **7**:1899–1911.
- Frank DN, St. Amand AL, Feldman RA, Boedeker EC, Harpaz N, Pace NR. (2007). Molecular-phylogenetic characterization of microbial community imbalances in human inflammatory bowel diseases. *Proc Natl Acad Sci U S A* **104**:13780–13785.
- Galand PE, Casamayor EO, Kirchman DL, Lovejoy C. (2009). Ecology of the rare microbial biosphere of the Arctic Ocean. *Proc Natl Acad Sci U S A* **106**:22427–22432.
- Garcia SL, McMahon KD, Martinez-Garcia M, Srivastava A, Sczyrba A, Stepanauskas R, *et al.* (2013). Metabolic potential of a single cell belonging to one of the most abundant lineages in freshwater bacterioplankton. *ISME J* **7**:137–147.
- Ghai R, Rodriguez-Valera F, McMahon KD, Toyama D, Rinke R, Cristina Souza de Oliveira T, *et al.* (2011). Metagenomics of the Water Column in the Pristine Upper Course of the Amazon River. *PLoS One* **6**:e23785.
- Gilbert JA, Steele JA, Caporaso JG, Steinbrück L, Reeder J, Temperton B, *et al.* (2012). Defining seasonal marine microbial community dynamics. *ISME J* **6**:298–308.
- Griffiths RI, Whiteley AS, O'Donnell AG, Bailey MJ. (2000). Rapid Method for Coextraction of DNA and RNA from Natural Environments for Analysis of Ribosomal DNA- and rRNA-Based Microbial Community Composition. *Appl Environ Microbiol* **66**:5488–5491.

- Herlemann DP, Labrenz M, Jurgens K, Bertilsson S, Waniek JJ, Andersson AF. (2011). Transitions in bacterial communities along the 2000 km salinity gradient of the Baltic Sea. *ISME J* **5**:1571–1579.
- Janauer GA, Schmidt-Mumm U, Schmidt B. (2010). Aquatic macrophytes and water current velocity in the Danube River. *Ecol Eng* **36**:1138–1145.
- Kirschner AKT, Kavka GG, Velimirov B, Mach RL, Sommer R, Farnleitner AH. (2009). Microbiological water quality along the Danube River: Integrating data from two whole-river surveys and a transnational monitoring network. *Water Res* **43**:3673–3684.
- Kronvang B, Hoffmann C, Svendsen L, Windolf J, Jensen J, Døge J. (1999). Retention of nutrients in river basins. *Aquat Ecol* **33**:29–40.
- Langenheder S, Jürgens K. (2001). Regulation of bacterial biomass and community structure by metazoan and protozoan predation. *Limnol Oceanogr* **46**:121–134.
- Lanzén A, Jørgensen SL, Huson DH, Gorfer M, Grindhaug SH, Jonassen I, *et al.* (2012). CREST – Classification Resources for Environmental Sequence Tags. *PLoS One* **7**:e49334.
- Lemke MJ, Lienau EK, Rothe J, Pagioro TA, Rosenfeld J, DeSalle R. (2008). Description of freshwater bacterial assemblages from the Upper Paraná River floodpulse system, Brazil. *Microb Ecol* **57**:94–103.
- Liska I, Slobodnik J, Wagner F. (2008). Joint Danube Survey 2, Final Scientific Report. *International Commission for the Protection of the Danube River* 242.
- Liu Z, Huang S, Sun G, Xu Z, Xu M. (2012). Phylogenetic diversity, composition and distribution of bacterioplankton community in the Dongjiang River, China. *FEMS Microbiol Ecol* **80**:30–44.
- Lozupone CA, Knight R. (2007). Global patterns in bacterial diversity. *Proc Natl Acad Sci U S A* **104**:11436–11440.
- Lundin D, Severin I, Logue JB, Östman Ö, Andersson AF, Lindström ES. (2012). Which sequencing depth is sufficient to describe patterns in bacterial  $\alpha$ - and  $\beta$ -diversity? *Environ Microbiol Rep* **4**:367–372.
- Madsen EL. (2011). Microorganisms and their roles in fundamental biogeochemical cycles. *Curr Opin Biotechnol* **22**:456–464.
- Masella A, Bartram A, Truszkowski J, Brown D, Neufeld J. (2012). PANDAseq: paired-end assembler for illumina sequences. *BMC Bioinformatics* **13**:1–7.
- Mueller-Spitz SR, Goetz GW, McLellan SL. (2009). Temporal and spatial variability in nearshore bacterioplankton communities of Lake Michigan. *FEMS Microbiol Ecol* **67**:511–522.
- Newton RJ, Jones SE, Eiler A, McMahon KD, Bertilsson S. (2011). A guide to the natural history of freshwater lake bacteria. *Microbiol Mol Biol Rev* **75**:14–49.
- Von der Ohe PC, Dulio V, Slobodnik J, De Deckere E, Kühne R, Ebert R-U, *et al.* (2011). A new risk assessment approach for the prioritization of 500 classical and emerging organic microcontaminants as potential river basin specific pollutants under the European Water Framework Directive. *Sci Total Environ* **409**:2064–2077.
- Oksanen J, Blanchet FG, Kindt R, Legendre P, Minchin PR, O’Hara RB, *et al.* (2013). vegan: Community Ecology Package. R package version 2.0-10. <http://CRAN.R-project.org/package=vegan>.

- Pernthaler J. (2005). Predation on prokaryotes in the water column and its ecological implications. *Nat Rev Microbiol* **3**:537–546.
- Peura S, Eiler A, Bertilsson S, Nykanen H, Tirola M, Jones RI. (2012). Distinct and diverse anaerobic bacterial communities in boreal lakes dominated by candidate division OD1. *ISME J* **6**:1640–1652.
- Raymond PA, Hartmann J, Lauerwald R, Sobek S, McDonald C, Hoover M, *et al.* (2013). Global carbon dioxide emissions from inland waters. *Nature* **503**:355–359.
- R Core Team. (2013). R: A language and environment for statistical computing. R Foundation for Statistical Computing, Vienna, Austria. URL <http://www.R-project.org/>.
- Ruiz-González C, Proia L, Ferrera I, Gasol JM, Sabater S. (2013). Effects of large river dam regulation on bacterioplankton community structure. *FEMS Microbiol Ecol* **84**:316–331.
- Salcher MM, Pernthaler J, Posch T. (2011). Seasonal bloom dynamics and ecophysiology of the freshwater sister clade of SAR11 bacteria ‘that rule the waves’ (LD12). *ISME J* **5**:1242–1252.
- Seitzinger SP, Mayorga E, Bouwman AF, Kroeze C, Beusen AHW, Billen G, *et al.* (2010). Global river nutrient export: A scenario analysis of past and future trends: GLOBAL RIVER EXPORT SCENARIOS. *Global Biogeochem Cycles* **24**:n/a–n/a.
- Sekiguchi H, Watanabe M, Nakahara T, Xu B, Uchiyama H. (2002). Succession of bacterial community structure along the Changjiang River determined by Denaturing Gradient Gel Electrophoresis and clone library analysis. *Appl Environ Microbiol* **68**:5142–5150.
- Shokralla S, Spall JL, Gibson JF, Hajibabaei M. (2012). Next-generation sequencing technologies for environmental DNA research. *Mol Ecol* **21**:1794–1805.
- Sinclair L, Osman OA, Bertilsson S, Eiler A. (submitted). Microbial community composition and diversity: evaluating the Illumina platform.
- Sjöstedt J, Koch-Schmidt P, Pontarp M, Canbäck B, Tunlid A, Lundberg P, *et al.* (2012). Recruitment of members from the rare biosphere of marine bacterioplankton communities after an environmental disturbance. *Appl Environ Microbiol* **78**:1361–1369.
- Sogin ML, Morrison HG, Huber JA, Welch DM, Huse SM, Neal PR, *et al.* (2006). Microbial diversity in the deep sea and the underexplored ‘rare biosphere’. *Proc Natl Acad Sci U S A* **103**:12115–12120.
- Sommerwerk N, Bloesch J, Paunović M, Baumgartner C, Venohr M, Schneider-Jacoby M, *et al.* (2010). Managing the world’s most international river: the Danube River Basin. *Mar Freshw Res* **61**:736–748.
- Staley C, Unno T, Gould TJ, Jarvis B, Phillips J, Cotner JB, *et al.* (2013). Application of Illumina next-generation sequencing to characterize the bacterial community of the Upper Mississippi River. *J Appl Microbiol* **115**:1147–1158.
- Tu J. (2011). Spatial and temporal relationships between water quality and land use in northern Georgia, USA. *J Integr Env Sci* **8**:151–170.
- Vannote RL, Minshall GW, Cummins KW, Sedell JR, Cushing CE. (1980). The River Continuum Concept. *Can J Fish Aquat Sci* **37**:130–137.
- Velimirov B, Milosevic N, Kavka G, Farnleitner A, Kirschner AT. (2011). Development of the bacterial compartment along the Danube River: a continuum despite local influences. *Microb Ecol* **61**:955–967.
- Weinbauer MG. (2004). Ecology of prokaryotic viruses. *FEMS Microbiol Rev* **28**:127–181.

Winter C, Hein T, Kavka G, Mach RL, Farnleitner AH. (2007). Longitudinal changes in the bacterial community composition of the Danube River: a whole-river approach. *Appl Environ Microbiol* **73**:421–431.

Withers PJA, Jarvie HP. (2008). Delivery and cycling of phosphorus in rivers: A review. *Sci Total Environ* **400**:379–395.

Zampella RA, Procopio NA, Lathrop RG, Dow CL. (2007). Relationship of land-use/land-cover patterns and surface-water quality in the Mullica River basin. *J Am Water Resour Assoc* **43**:594–604.

Zwart G, Byron C. Crump, Miranda P. Kamst-van Agterveld, Ferry Hagen, Suk-Kyun Han. (2002). Typical freshwater bacteria: an analysis of available 16S rRNA gene sequences from plankton of lakes and rivers. *Aquat Microb Ecol* **28**:141–155.



## Titles and legends to figures

**Figure 1 A** Cumulative graph of the quantitative contribution of OTUs based on their presence in the respective sample fraction. X-axis displays the fraction of samples, y-axis shows the cumulative number of reads corresponding to the OTUs that appear in the respective sample fraction. The blue line represents the attached bacterial fraction ( $>3.0 \mu\text{m}$ ); the red line shows the free-living bacterial fraction ( $0.2\text{-}3.0 \mu\text{m}$ ).

**B** Gradual development of the read-proportion assigned to the operationally defined “core community” of the free-living and attached fraction along the Danube River. Core communities were defined by including all OTUs that are present in at least 90 percent of all samples of the respective size fraction. Red symbols indicate samples from the free-living fraction ( $0.2\text{-}3.0 \mu\text{m}$ ); Blue symbols indicate the attached sample fraction ( $>3.0 \mu\text{m}$ ). Dark blue lines represent fitted linear models with confidence intervals of 0.95 in red and blue for the respective fractions. Detailed regression statistics are shown in Table 1.

**Figure 2** The gradual development of the bacterial richness (chao1; **A**) and Pielou’s evenness (**J**; **B**) along the Danube River in the two size fractions, representing the bacterioplankton communities  $0.2\text{-}3.0 \mu\text{m}$  and  $> 3.0 \mu\text{m}$  (corresponding to free-living and attached bacterioplankton). Red symbols indicate samples from the free-living fraction ( $n=27$ ) and blue symbols samples from the attached fraction ( $n=40$ ). Dark blue lines represent fitted linear models with confidence intervals of 0.95 in red and blue for the respective fractions. Detailed regression statistics are shown in Table 1.

**Figure 3** The visualization of the beta diversity analysis based on the Bray-Curtis dissimilarity index performed in order to investigate the compositional dissimilarity between sites along the Danube River and its tributaries. Stress value of the non-metric



477 multidimensional scaling (NMDS) was 0.17. Circles represent free-living bacterial  
478 communities (0.2-3.0  $\mu\text{m}$ ), triangles represent attached bacterial communities (>3.0  $\mu\text{m}$ ).  
479 Open symbols display tributary-samples whereas full symbols indicate Danube River  
480 communities. Gradient from blue-black to light blue indicate the position of the sampling site  
481 upstream from the river mouth. The official assignment of river kilometres (rkm) for the  
482 Danube River is defined reverse from mouth (rkm 0) towards source with our most upstream  
483 site at rkm 2 600.

484

485 **Figure 4** A heatmap (A) revealing the dynamics of the eleven most abundant typical  
486 freshwater tribes along the Danube river transect according to (Newton *et al.*, 2011). The  
487 gradient from light blue to black-blue indicates the relative quantitative contribution to all  
488 sequences in any one sample with a maximum of 16 percent. The overall contribution of  
489 typical freshwater tribes, clades and lineages (Newton *et al.*, 2011) to the river  
490 bacterioplankton amplicon sequences is depicted in panel B. Free-living Danube River  
491 samples are arranged in the middle of the panel including “F” in the sample-ID; Attached  
492 samples are displayed on the right side including “A” in the sample-ID; Both fractions of  
493 tributary-samples are arranged at the left side with “F” for free-living and “A” for attached  
494 samples in the sample-ID;

495

496 **Figure 5** Results from the SEQenv analyses scoring sequences according to their  
497 environmental context. Y-axis represents the proportion of groundwater (A) and soil (B) terms  
498 associated with sequence reads per sample along the Danube River transect (x-axis). Red  
499 symbols indicate samples from the 0.2-3.0  $\mu\text{m}$  fraction (n=27) and blue symbols samples  
500 from the >3.0  $\mu\text{m}$  fraction (n=40). Dark blue lines represent fitted linear models with  
501 confidence intervals of 0.95 in red and blue for the respective fractions. Detailed regression  
502 statistics are given in the figure.

503

504 **Table 1.** Summary of regression statistics (Multiple R-squared and p-value) for fitted linear  
505 models between chao1 richness (Fig. 2A), Pielou's evenness (J; Fig. 2B) as well as core-  
506 community proportions and river kilometre (Fig. 1B) for both size fractions (0.2-3.0  $\mu\text{m}$  and  
507  $>3.0 \mu\text{m}$ ) in the investigated Danube River samples.

508

509 **Table 2.** Summary statistics of correspondence between environmental variables and the  
510 projections of bacterioplankton community samples in the NMDS ordination based on either  
511 free-living or attached size fraction from the Danube River. Results were obtained using  
512 function 'envfit' included in the R-package 'vegan' (Oksanen *et al.*, 2013).

513

514 **Figure S1.** Absolute quantitative abundance of OTUs in all samples. Displayed is the  
515 decreasing trend from many OTUs with very few representative reads ( $10^1$ - $10^2$ ; left side) to  
516 fewer OTUs with high abundance ( $10^2$ - $10^4$  reads; right side). Y-axis displays the number of  
517 OTUs belonging to each circle, with the corresponding number of representative reads on the  
518 x-axis.

519

520 **Figure S2.** Boxplot of variability in bacterial communities in different size fractions (0-2-3.0  
521  $\mu\text{m}$  and  $>3.0 \mu\text{m}$ ) based on betadispersion of Bray-Curtis dissimilarities. Left: Variability  
522 (distance from centroid) in the free-living bacterial community; Right: Variability in the  
523 attached bacterial community.

524

525

|                                                     | <b>R2</b> | <b>P-value</b> |
|-----------------------------------------------------|-----------|----------------|
| Chao1 richness free-living                          | -0.392    | <0.001         |
| Pielou's Evenness free-living                       | -0.483    | <0.001         |
| Chao1 richness attached                             | -0.173    | <0.01          |
| Pielou's Evenness attached                          | -0.501    | <0.001         |
| Total read proportion of free-living Core Community | 0.455     | <0.001         |
| Total read proportion of attached Core Community    | 0.316     | <0.001         |

| Variables                  | free-living | attached |
|----------------------------|-------------|----------|
|                            | R2          | R2       |
| River_km                   | 0.844***    | 0.795*** |
| WaterTemperature           | 0.264**     | 0.035    |
| DissolvedOxygen            | 0.05        | 0.002    |
| pH                         | 0.330***    | 0.214**  |
| Conductivity               | 0.303*      | 0.093    |
| Alkalinity                 | 0.626***    | 0.333*** |
| Ammonium                   | 0.117       | 0.004    |
| Nitrite                    | 0.285**     | 0.254**  |
| Nitrate                    | 0.705***    | 0.419*** |
| OrganicNitrogen            | 0.024       | 0.076    |
| OrthophosphatePhosphorus   | 0.186*      | 0.099.   |
| TotalPhosphorus            | 0.069       | 0.059    |
| Silicates_Dissolved        | 0.504***    | 0.515*** |
| Phytoplankton_Biomass_Chla | 0.179*      | 0.380*** |
| TotalSuspendedSolids       | 0.150.      | 0.345*** |
| Production_total           | 0.051.      | 0.397*** |
| DOC                        | 0.042       | 0.183*   |

Signif. codes: 0 '\*\*\*' 0.001 '\*\*' 0.01 '\*' 0.05 '.' 0.1 ' ' 1

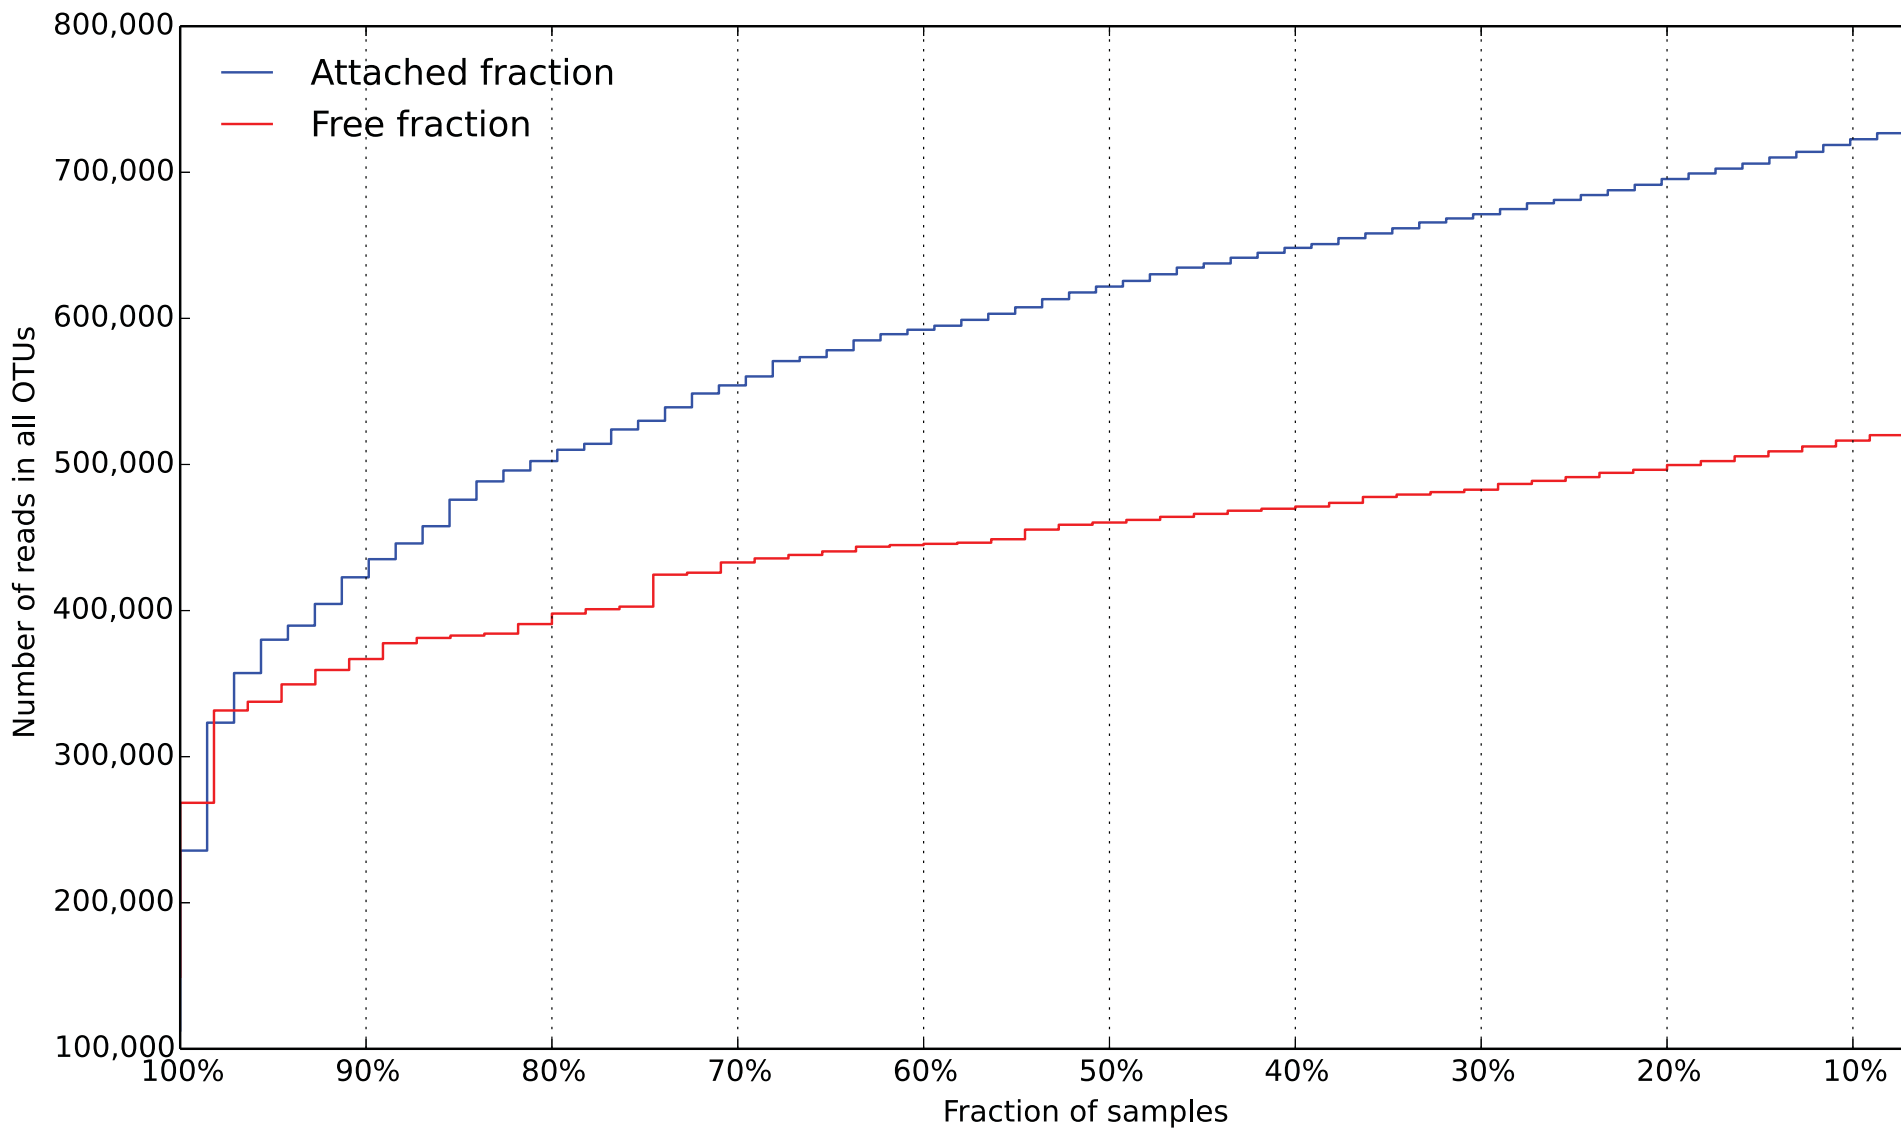

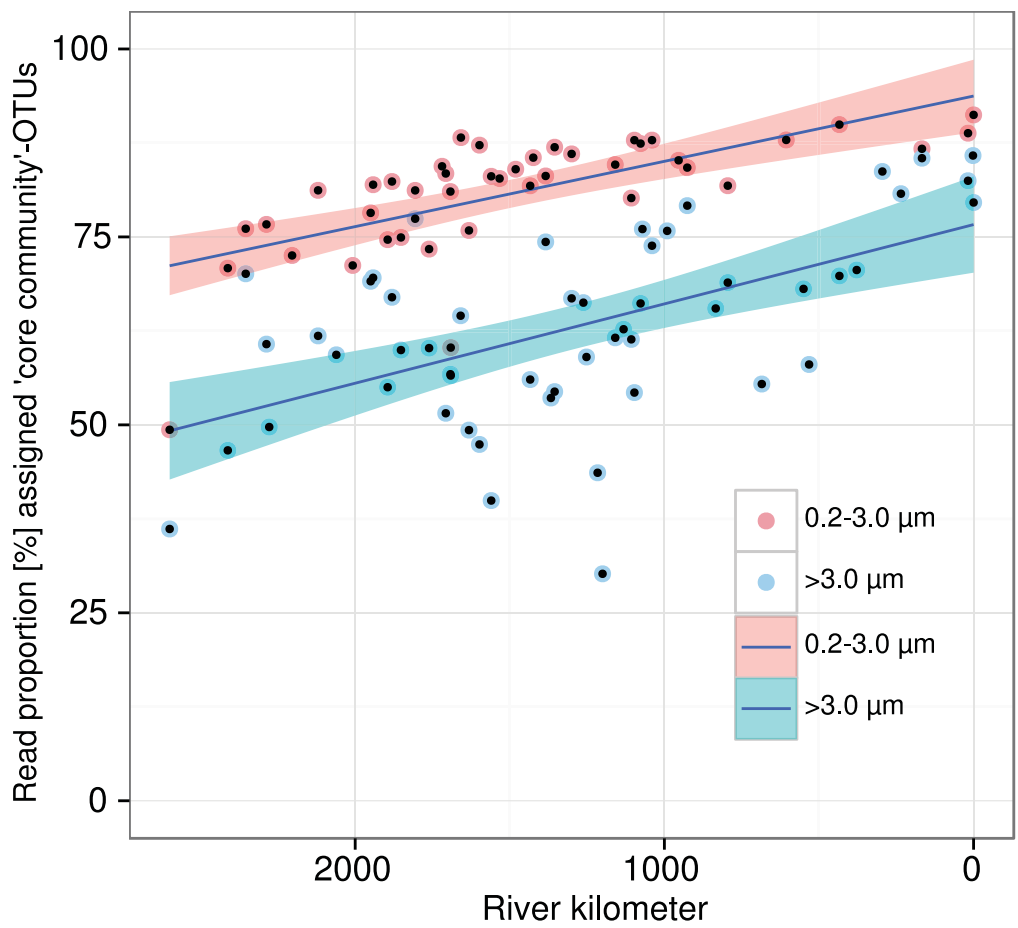

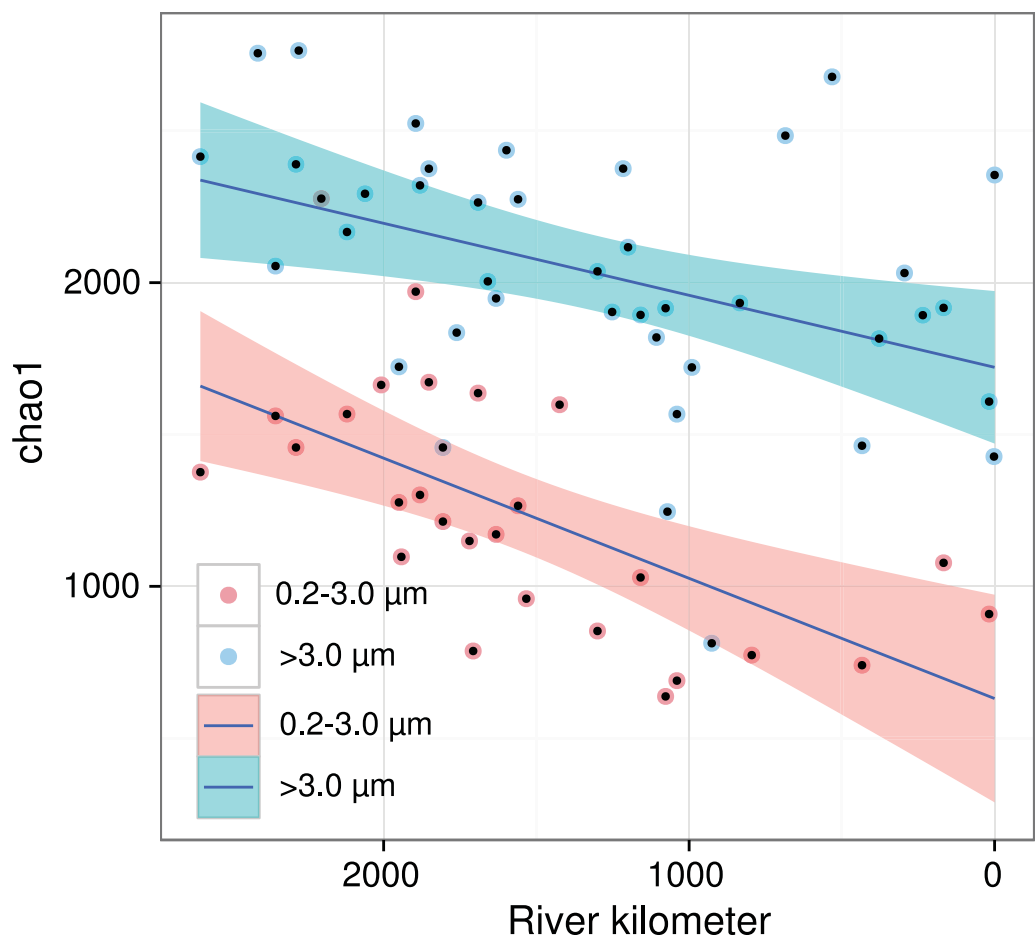

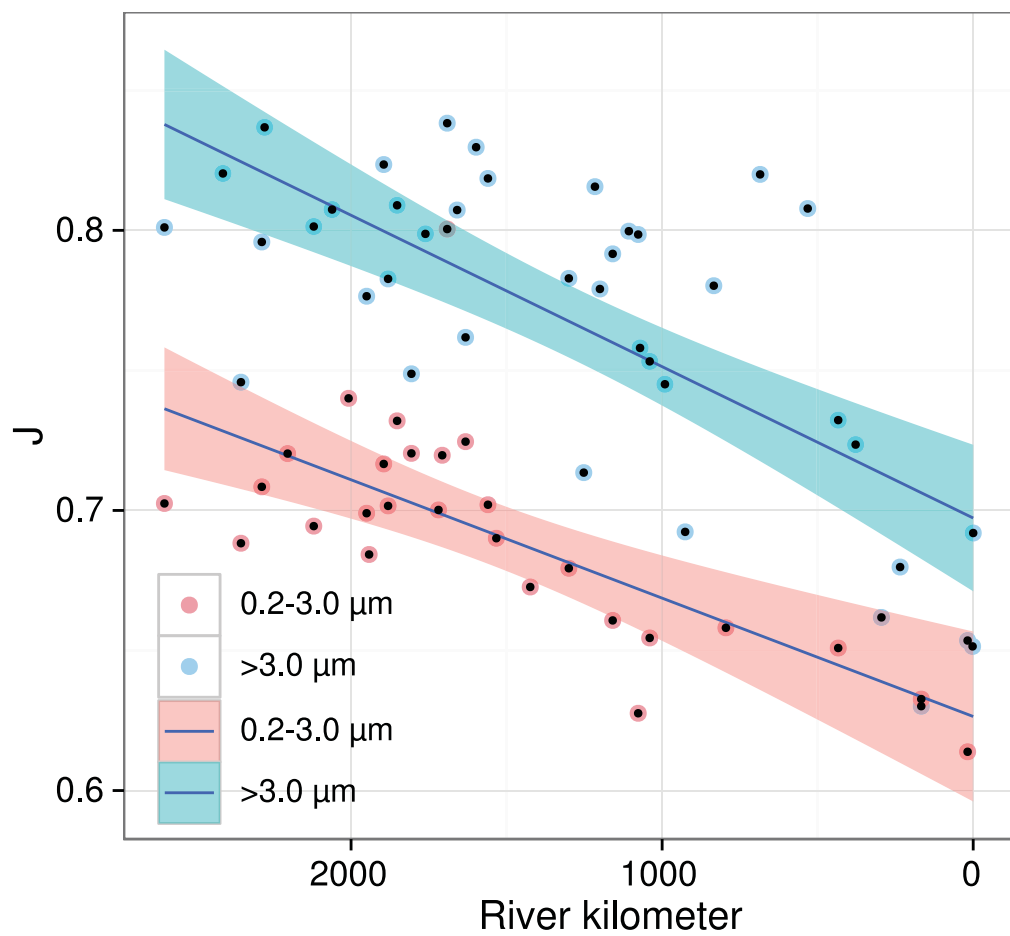



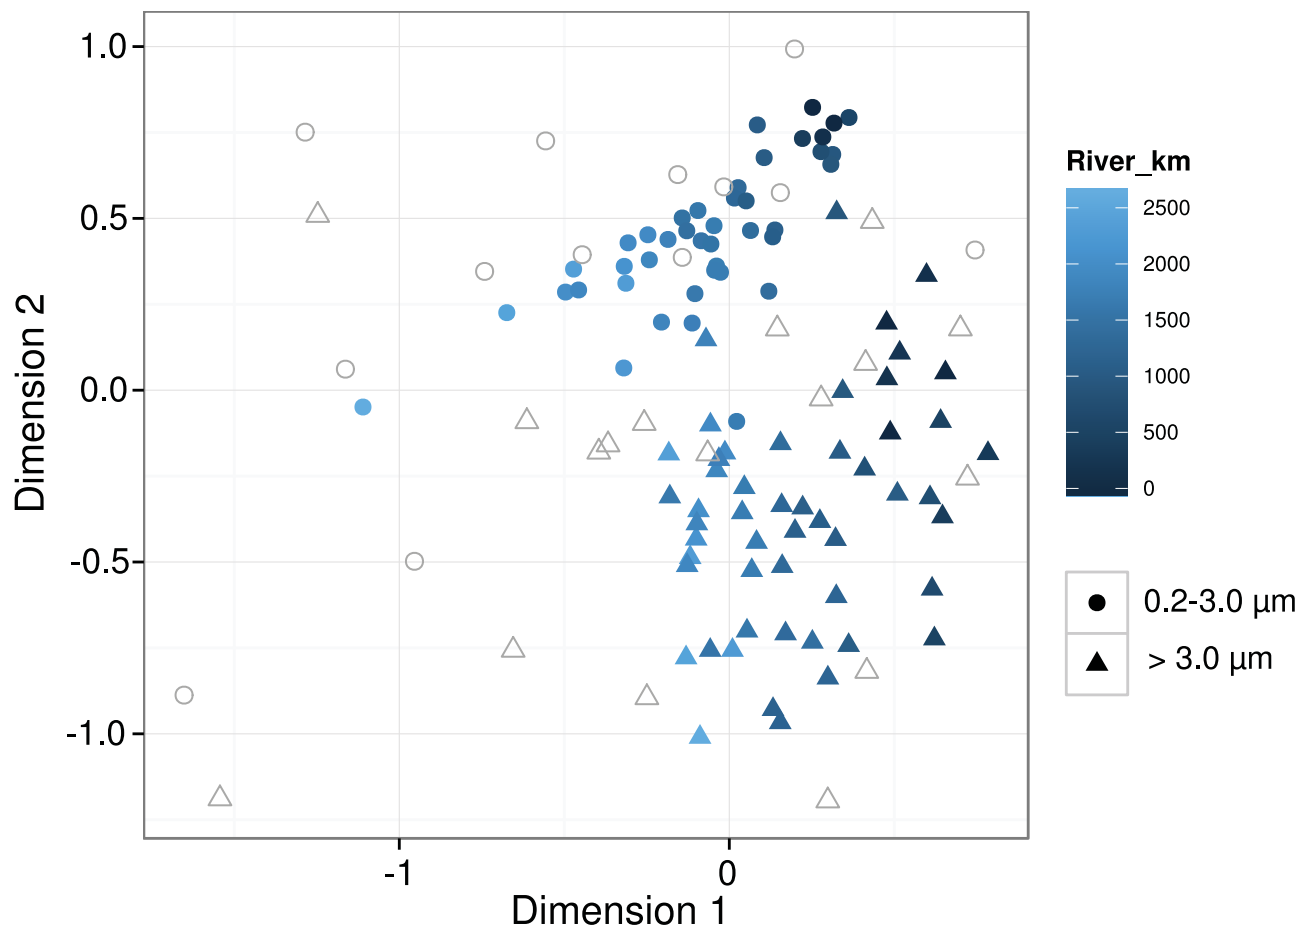

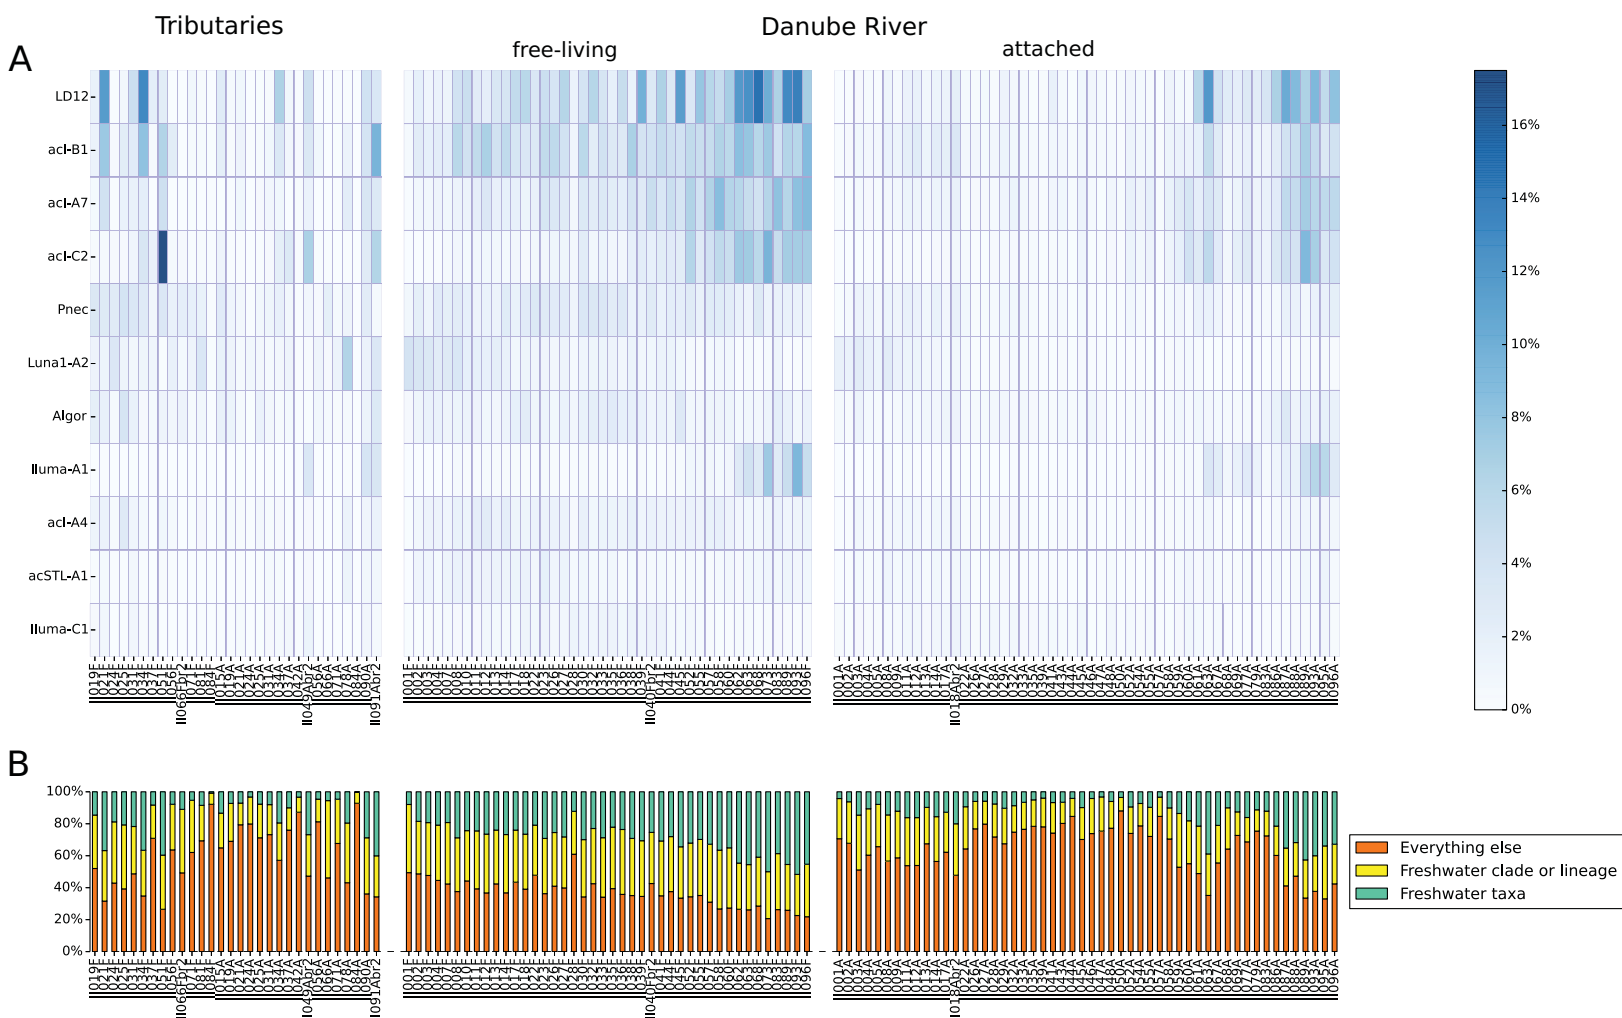

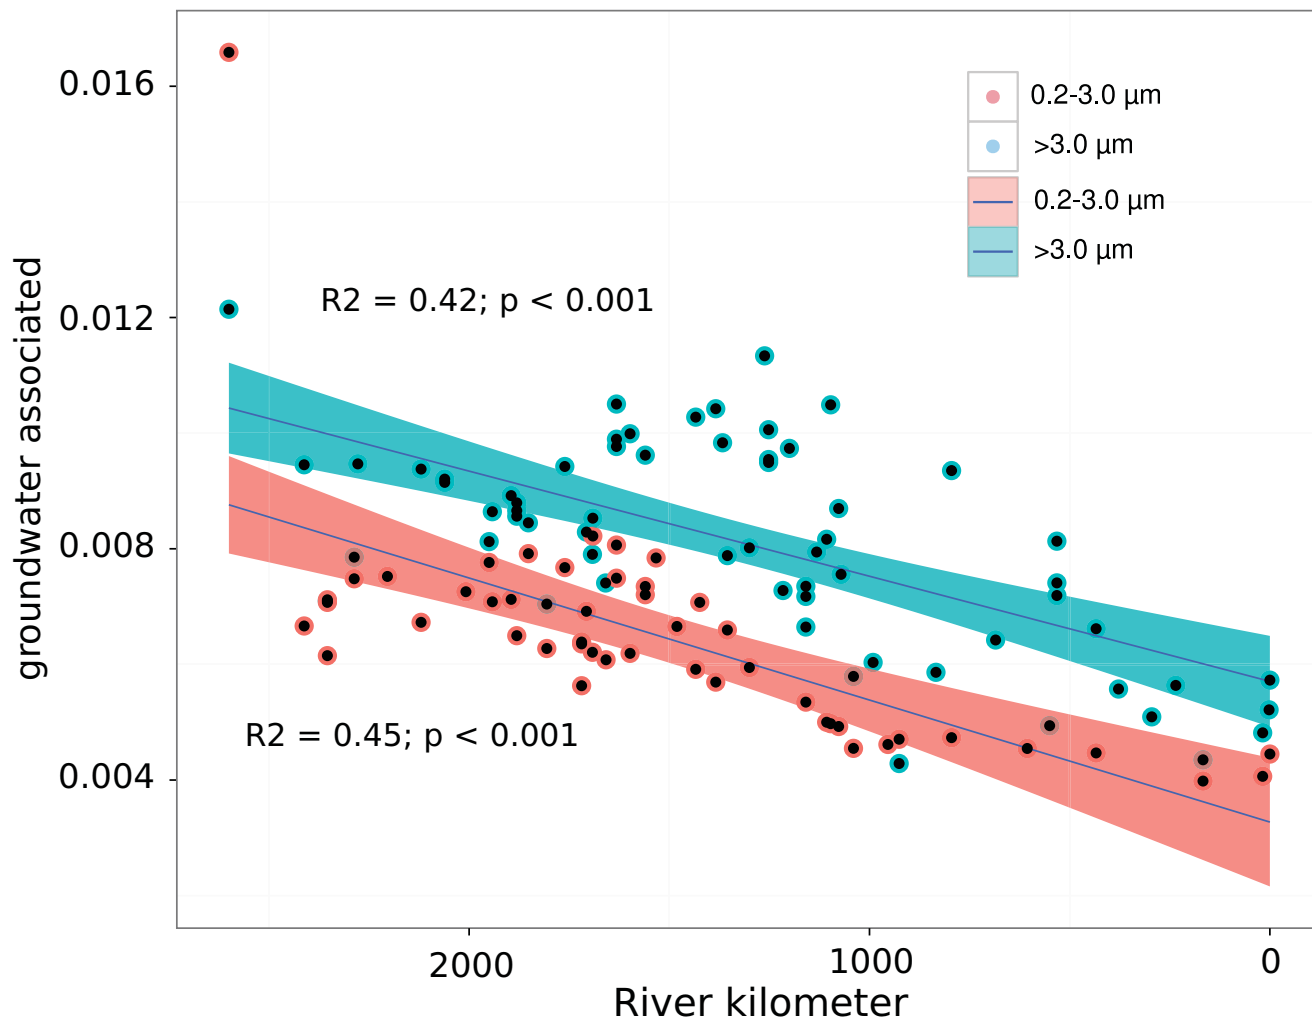

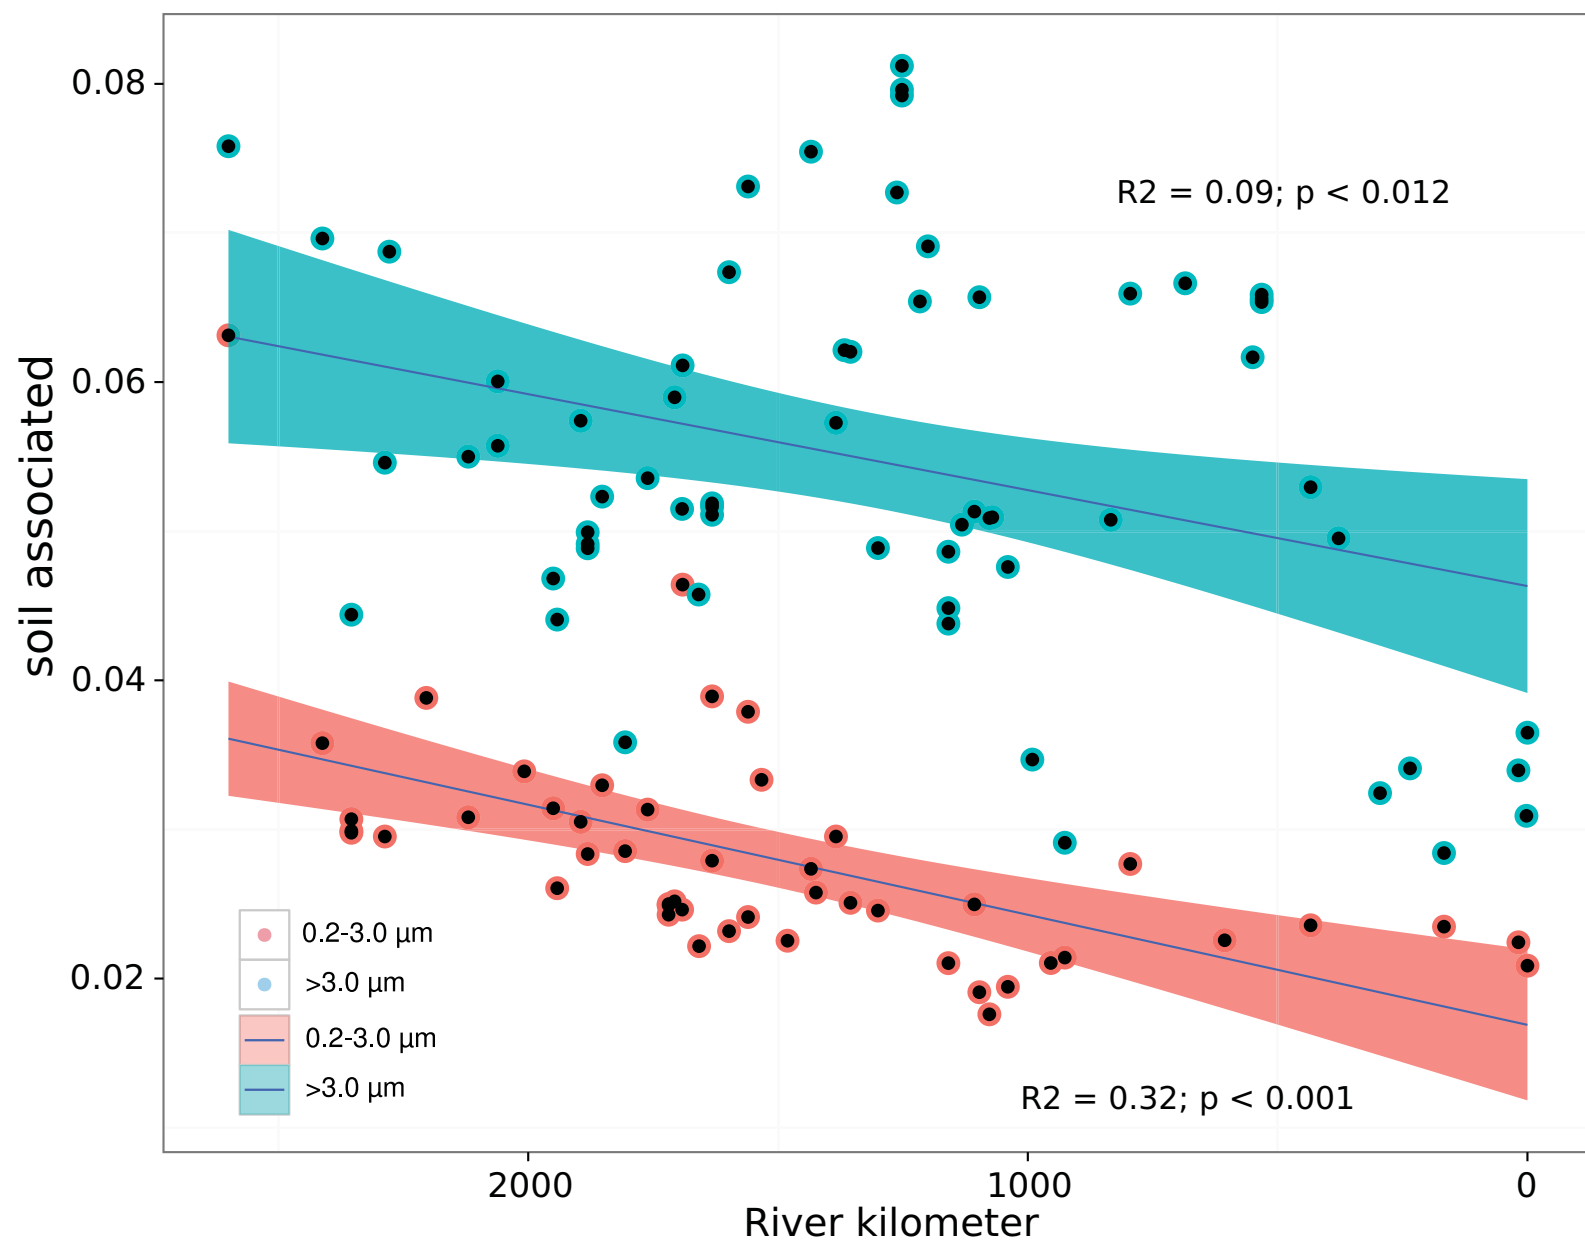

Source: http://biorxiv.org/content/10.1101/010041v1.full.pdf
